# Supplementary material
Source: Elsevier journal article supplement (https://www.sciencedirect.com/science/article/pii/S0211699521001685)
Supplement: mmc1 [file S0211699521001685:mmc1.docx]

1. Contenido

[Anexo 1. Perfil profesional de los autores de la guía 2](#_Toc79359938)

[Anexo 2: Declaración de conflictos de interés 18](#_Toc79359939)

[Anexo 3: Solicitud de atención sanitaria de diálisis de forma temporal 20](#_Toc79359940)

[Anexo 4: Informe clínico médico 22](#_Toc79359941)

[Anexo 5. Informe de enfermería 24](#_Toc79359942)

[Anexo 6: Documento de aceptación/denegación de pacientes desplazados 26](#_Toc79359943)

[Anexo 7: Indicadores globales 28](#_Toc79359944)

[Anexo 8: Índice de Charlson modificado 37](#_Toc79359945)

[Anexo 9: Selecting a target Kt by BSA based on Eq. (1). 39](#_Toc79359946)

[Anexo 10: Relación de eventos adversos 40](#_Toc79359947)

- 1. Anexo 1. Perfil profesional de los autores de la guía

**ALCALDE BEZHOLD, GUILLERMO**

Hospital Universitario Araba. Organización Sanitaria Integrada Araba, Osakidetza. Vitoria-Gasteiz, Álava.

Jefe de Servicio de Nefrología, Hospital Universitario Araba.

Profesor Asociado del Departamento de Medicina, Universidad del País Vasco.

**ALCÁZAR ARROYO, ROBERTO**

Hospital Universitario Infanta Leonor. Madrid.

Nefrólogo clínico en Hospital Universitario Infanta Leonor, Madrid.

Editor Jefe Revista Nefrología.

Editor Revista nefroPLUS.

**ANGOSO DE GUZMÁN, MANUEL**

Hospital Vithas Consuelo. Valencia.

Jefe Servicio de Nefrología Hospital Vithas Consuelo.

Diplomado Certificado en la Especialidad de Medicina Interna por la American Board of Internal Medicine, septiembre 1989.

Diplomado en Nefrología por la American Board of Internal Medicine en 1996.

University of Navarra Medical School, Foreign Medical Graduate Examination in the Medical Sciences.

(FMGEMS) by the Education Commission for Foreign Medical Graduate, Internal medicine Georgetown Department of Medicine DC General Hospital Washington DC.

Federal License Examination (FLEX) en 1989.

Licenciado por la Virginia Board of Medicine en August 1989.

Clinical Fellowen Nefrología en la Georgetown University Medical Center 1990 –1992.

Board Certified en Nefrología por la American Board of Internal Medicine en septiembre de 1996.

Board Certified en Medicina interna por la American Board of Internal Medicine en 1986

**ARIAS-GUILLÉN, MARTA**

Hospital Clínico. Barcelona.

Graduada en la Facultad de Medicina de Santander en 2001, realiza la Residencia en el Servicio de Nefrología y Trasplante Renal del Hospital Clínico de Barcelona en el Hospital Clínic de Barcelona en el periodo 2003-2007. Posteriormente se incorporó a la sección de diálisis de este hospital en la que actualmente permanece. Ha participado activamente en varios proyectos relacionados con la hemodiafiltración en línea, sensores de biofeedback y bioimpedancia eléctrica para evaluar el estado de hidratación y nutrición en pacientes en diálisis, siendo sus principales áreas de interés dosis de hemodiálisis, adecuación de diálisis, identificación de nuevas toxinas urémicas mediante el análisis proteómico y nutrición.

Es miembro de la Sociedad Española y Catalana de Nefrología, así como del Grupo de Nutrición en Diálisis Catalán y tiene más de 30 publicaciones originales, 5 revisiones, más de 100 resúmenes para congresos nacionales e internacionales y 8 capítulos de libros en su haber.

Es profesora en el Máster de Hemodiálisis para Especialistas en Nefrología en Madrid y del Máster de Nutrición y Metabolismo de la Universidad de Barcelona.

**ARENAS, MARÍA DOLORES**

Directora médica de la Fundación Renal Iñigo Alvarez de Toledo desde abril de 2021.

Previamente Jefe de sección de Nefrología clínica y diálisis del Hospital del Mar de Barcelona durante 1 año y medio y Jefe de servicio de Nefrologia en Alicante durante 22 años.

Doctorada en medicina y cirugía en la Facultad de Medicina de la Universidad de Alicante.

Profesora del Máster de Hemodiálisis de la Universidad Complutense de Madrid.

**ARRIBAS COBO, PATRICIA**

Hospital Universitario Infanta Leonor. Madrid

Enfermera de Nefrología desde 1993. Supervisora de enfermería de la Unidad de diálisis desde 2009.

Secretaria General de la Sociedad Española de Enfermería Nefrológica (SEDEN) 2001-2005. Vicepresidenta SEDEN desde 2018.

Perteneciente al equipo docente de la SEDEN desde 2006 hasta 2018.

Varias publicaciones en la revista de Enfermería Nefrológica y ponencias en los congresos SEDEN.

**DE SEQUERA ORTIZ, PATRICIA**

Hospital Universitario Infanta Leonor. Madrid.

Jefe de Sección de Nefrología. Hospital Universitario Infanta Leonor.

Profesor asociado Medicina. Universidad Complutense de Madrid.

Doctorada por la Universidad Autónoma de Madrid. Cum laude y premio extraordinario.

Máster de Gestión Sanitaria. Plan de Formación EUROINNOVA. Sobresaliente.

Curso de Gestión Sanitaria. Universidad Antonio de Nebrija.

Acreditada por la Agencia Nacional de Evaluación de la Calidad y Acreditación (ANECA) para poder participar en concursos de acceso a cuerpos docentes universitarios.

**DEL PINO Y PINO, MARÍA DOLORES**

Hospital Torrecárdenas, Almería.

Dra. en Medicina y Cirugía, Universidad de Granada, año 1987. Especialidad Nefrología, en el H. U. Virgen de las Nieves, Granada, S.A.S., año 1991.

Master Universitario en Gestión y Planificación Sanitaria para Directivos de la Salud, 2015-2016, Universidad Europea de Madrid.

Experto Universitario en Hemodiálisis y Experto Universitario en Aféresis terapéutica. Universidad Complutense. Madrid.

Máster en enfermedad ateroembólica y técnicas diagnósticas no invasivas, Universidad de Lleida.

Jefa de Servicio de Nefrología/Directora Unidad de Gestión Clínica Nefrología y Diálisis, H. Universitario Torrecárdenas (hasta 2019), Almería.

Acreditación de competencias profesionales Nivel Excelente por la A.C.S.A

Académica de la Real Academia de Medicina (RAMAO).

Sociedad Española de Nefrología, Tesorera 2007-2014; Presidenta (2014-2017) , reelegida Presidenta 2017-2020. Elaboración junto con la JD del Primer Plan estratégico de la S.E.N. 2017-2020.

Docencia, Publicaciones e investigación: MD: Universidad de Almería-Universidad de Granada, colaboradora docente programas doctorado y posdoctorado y máster; así mismo en temas HTA y riñón organizados por la S.E.N. y AP, jornadas nacionales de enfermos renales y de enfermería. Directora tesis doctorales y en elaboración. Docente en cursos acreditados HTA, Diálisis y ERC, nefropatía diabética. Responsable tutora de la Docencia posgraduada del S. Nefrología del C.H.T. 1993-2006; tutora docente 2012-2014. Miembro grupo PAIDI-investigación Junta de Andalucía.

Co-Directora Master de Aféresis Terapéutica, Universidad Complutense de Madrid.

Co-Directora Master en Enfermedades renales hereditarias. Universidad de Alcalá.

Directora Curso Nefrología Intervencionista. IAVANTE.

Miembro activo en actividades docentes, investigadoras y de salud publica en comisiones y grupos de trabajo S.A.S., Ministerio Sanidad, otras sociedades científicas nacionales e internacionales, asociaciones y escuela de pacientes renales.

**DÍAZ GÓMEZ, JUAN MANUEL**

Licenciado en Medicina y Cirugía General (1986, Universitat de Barcelona).

Especialista en Nefrología (1991, Fundació Puigvert).

Doctor en Medicina (2008, Universitat Autònoma de Barcelona).

Profesor titular de Medicina (2019, Universitat de Vic-Central de Catalunya).

Trayectoria científica clínica en dos fases:

Trasplante renal: Participación en 3 Proyectos FIS, 2 como IP ("Alteraciones de la homeostasis de la glucosa tras el trasplante renal: incidencia, factores de riesgo y consecuencia”, “Inmunosupresión óptima en pacientes de alto riesgo de diabetes de novo tras el trasplante renal: un estudio prospectivo, multicéntrico, controlado y randomizado”) y 1 como investigador coordinador (“Farmacogenética del Tacrolimus (FK506) y riesgo cardiovascular en el trasplante renal”), lectura de la Tesis Doctoral y múltiples publicaciones, presentaciones orals/posters en congresos/conferencias invitadas sobre la evolución clínica de la diabetes post-trasplante renal, el valor pronóstico de la PA medida con MAPA en el primer año post-trasplantament renal, el riesgo de diabetes mellitus post-trans plante renal, el impacto de diferentes factores de riesgo cardiovascular sobre la supervivencia del injerto i del pacient y los factores predicitivos de test de sobrecarga oral de glucosa patológico.

Diálisis: Participación en 1 Proyecto FIS como investigador coordinador (“Biomarcadores de pronóstico y estrategias para disminuir la morbimortalidad de pacientes con enfermedad renal crónica”). Varias publicaciones relacionadas con la morbimortalitat de los pacientes en hemodiálisis y los efectos de diferentes estrategias para disminuir la misma (HDF on line, dializadores con vitamina D, administración de mosto, etc.).

**GARCÍA MASET, RAFAEL**

Hospital Manises, Jefe de Servicio de Nefrología, Valencia.

Profesor Asociado Asistencial de Prácticas (PAAP) Grado de Medicina. Facultad de Medicina y Odontología. Universidad Católica de Valencia. Curso académico 2011/2012 hasta la actualidad.

Profesor Docente Investigador (PDI). Grado de Medicina. Facultad de Ciencias de la Salud. Universidad CEU Cardenal Herrera.

**GONZÁLEZ PARRA, EMILIO**

Fundación Jiménez Díaz. Madrid.

Adjunto de Nefrología. Fundación Jiménez Díaz. Profesor Asociado de la Universidad Autónoma De Madrid.

**HERNÁNDEZ MARRERO, DOMINGO**

Director Unidad de Gestión Clínica de Nefrología del Hospital Regional Universitario de Málaga.

Catedrático de Medicina de la Universidad de Málaga. Departamento de Medicina y Dermatología de la Universidad de Málaga.

Vicedirector Científico del Instituto Biomédico de Investigación de Málaga (IBIMA).

Coordinador del Programa de Trasplante Renal de la Red de Investigación Renal (REDINREN).

Presidente de la Sociedad Española de Trasplante (SET).

Investigador Principal de los grupos de investigación; REDINREN RD16/0009/0006; PAIDI CTS-663; “Nefrología y Trasplante Renal” del IBIMA.

Evaluador de los Proyectos de Investigación en Salud e Investigación Clínica del Instituto de Salud Carlos III, y de los proyectos de investigación de la Consejería de Salud de la Junta de Andalucía.

Dirección de 13 Tesis Doctorales.

Investigador Principal de 14 de Proyectos de Investigación Competitiva.

Más de 250 publicaciones científicas en revistas indexadas.

Coeditor de 5 Libros y Autor/Coautor de 43 Capítulos de Libros.

Miembro de los comités científicos de la Sociedad Española de Trasplante (SET) y de la Sociedad Española de Nefrología (SEN).

Revisor de revistas científicas nacionales e internacionales.

**HERRERO CALVO, JOSÉ ANTONIO**

Hospital Clínico San Carlos. Madrid.

Jefe de Sección de Nefrología del Hospital Clínico San Carlos de Madrid. Profesor Asociado de la Facultad de Medicina de la Universidad Complutense de Madrid. Co-director de los Títulos Propios de la Universidad Complutense de Madrid "Máster en Hemodiálisis para Especialistas en Nefrología", Máster en Aféresis Terapéuticas" y Máster en Hemodiálisis para Enfermería". Acreditado para Profesor Titular de Universidades. Ex-presidente de la Sociedad Madrileña de Nefrología "SOMANE" y Coordinador del "Plan Estratégico de Nefrología de la Comunidad de Madrid".

**MADUELL, FRANCISCO**

Hospital Clínic. Barcelona.

Jefe de Sección del Servicio de Nefrología y Trasplante Renal del Hospital Clínic Barcelona, España.

Formación universitaria de medicina en la Universidad de Barcelona, completó la residencia de Nefrología en la Clínica Universitaria de Navarra en Pamplona. Tesis Doctoral en la Universidad de Navarra en 1990.

Su interés científico se ha centrado principalmente en la diálisis adecuada, dosis de diálisis, tratamiento y prevención de complicaciones del tratamiento en hemodiálisis, tratamientos convectivos (OL-HDF, mid-dilution, mixed-dilution), depuración de toxinas urémicas, diálisis diaria, HDF-OL nocturna a días alternos y tratamientos con membranas de medio cut-off (hemodiálisis expandida). Él ha sido el investigador principal de varios estudios multicéntricos, entre ellos el estudio ESHOL.

Ha sido un miembro activo del grupo de trabajo EuDial Working Group on Dialysis Therapy de la Sociedad Europea de Nefrología (ERA-EDTA). Miembro de la Sociedad española de Nefrología (SEN), coordinador de las guías clínicas en hemodiálisis y ha sido el coordinador del registro de enfermos con diálisis diaria.

Colaborador habitual en el Editorial Board de diferentes revistas nacionales e internacionales.

Autor o coautor de más de 190 publicaciones en revistas, 17 capítulos de libros y más de 500 comunicaciones/presentaciones en reuniones científicas.

**MOLINA, PABLO**

Hospital Universitari Dr. Peset. Servei de Nefrologia. Departament de Medicina. Universitat de València.

Nefrólogo responsable de la Unidad de Hemodiálisis en el Hospital Universitario Dr. Peset y profesor asociado del Departamento de Medicina de la Universidad de Valencia. Sus principales áreas de interés son la nutrición del paciente renal, las alteraciones del metabolismo óseo-mineral asociadas a la enfermedad renal y la adecuación en hemodiálisis, incluyendo la hemodiálisis domiciliaria. Actualmente forma parte del European Renal Nutrition (ERN) working group de la European Renal Association – European Dialysis and Transplantation Association (ERA-EDTA), y del grupo de trabajo de Hemodiálisis Domiciliaria de la Sociedad Española de Nefrología (S.E.N). Colabora en la elaboración de las guías clínicas de hemodiálisis y de las alteraciones del metabolismo óseo-mineral de la S.E.N. Desde 2017 forma parte del comité editorial de Nephrology, Dialysis and Transplantation.

Autor o coautor de más de 40 publicaciones en revistas nacionales e internacionales, y más de 100 comunicaciones/presentaciones en reuniones científicas. Ha sido coordinador del Manual de Hemodiálisis Domiciliaria de la S.E.N.

**MOLINA NUÑEZ, MANUEL**

Hospital General Universitario Santa Lucía. Cartagena.

Jefe de Servicio de Nefrología desde el año 2008, mi actividad profesional e investigadora ha ido de la mano de la anemia renal (Artificial intelligence for a clinical decision support system to optimize anemia management in hemodialysis patients: results from an international pilot study. Carlo Barbieri, Manuel Molina, Pedro Ponce, Monika Tothova, Isabella Cattinelli, Jasmine Ion Titapiccolo, Flavio Mari, Claudia Amato, Frank Leipold, Wolfgang Wehmeyer, Stefano Stuard, Andrea Stopper, Bernard Canaud. Kidney International (2016) 90, 422–429), la dosis de diálisis (Hemodialysis patients receiving a greater Kt dose than recommended have reduced mortality and hospitalization risk. Francisco Maduell, Rosa Ramos, Javier Varas, Alejandro Martin-Malo, Manuel Molina, Rafael Perez-Garcia, Daniele Marcelli, Francesc Moreso, Pedro Aljama and Jose Ignacio Merello. Kidney International (2016) 90, 1332–1341, y el baño de diálisis (Citrate versus Acetate-Based dialysate in on-line haemodiafiltration. A prospective cross-over study. Manuel Molina, Rosa de Alarcón, Susana Roca, Gracia Alvarez, Maria Soledad Ros, Cristina Jimeno, Laura Bucalo, Isabel Villegas, María Ángeles García. Blood Purif 2015, 39: 181-187). Coautor de dos manuales conjuntos con Atención Primaria y de las Guias de la Sociedad Murciana de Nefrología en Hemodiálisis.

**OTERO GONZÁLEZ, ALFONSO**

Complejo Hospitalario Universitario de Ourense.

Doctor en Medicina y Cirugia USC 2007, y Jefe Servicio de Nefrologia CH Univesitario de Ourense desde 1986 .Experto Técnico de ACEI (Agencia de Certificación en Innovación Española ) y acreditado por ESADE BUSINESS SCHOOL en “ Gestión de unidades clínicas” (Madrid 2002).

Tutor Clínico USC – CH Universitario de Ourense (Nefrología) para los cursos: 1984-1985; 1990-1999,2007-2008, hasta la actualidad.

Director Tesis Doctoral (3) y Tesina (6) y becario del fondo de investigaciones de la seguridad social (FISS) los años 1989 y 1990, de la Secretaría Xeral de Investigacion en desenvolvemento da Xunta da Galicia (PR425R 2002/60-0) (P08/58) 10CSA383009PR)” y becario del fondo de investigaciones de la Seguridad Social (FISS) 2013-2017 y 2015-2017.

Miembro de la RETIC (código RD 16/0007) “Red de Investigación en actividades preventivas y de promoción de salud”.

Colaborador Unidad de Asesoramiento Científico técnico (avalia-t) en “Tecnologías Sanitarias nuevas y emergentes 2015. Miembro Patronato Fundación Investigación Biomédica Galicia Sur, Vocal Junta Directiva Sociedad Española de Nefrología y miembro Comité Redacción Revista Nefrología y Referee BMC Nephrology. Publicaciones (cvn :2018227 :120 Publications, 258,88 Impact Points / 20 "h" index ,37,66 RG score y 341 Comunicaciones a Congresos.

**PASCUAL, JULIO**

Jefe del Servicio de Nefrología y programa de trasplante Renal, Hospital Universitario 12 de Octubre, Madrid.

Jefe del Servicio de Nefrología y director del programa de Trasplante Renal del Hospital del Mar, Barcelona (2009 hasta abril 2021). Director del Área Asistencial y Médica del Consorci Mar Parc de Salut, Barcelona (2017-2021).

Licenciatura en medicina en la Universidad Complutense de Madrid (1986), especialista en Nefrología (1990), nefrólogo en Hospital Ramón y Cajal (1991-2009). 1992: Doctor en Medicina con Premio Extraordinario.

Fellowship de investigación y trasplante en la Universidad de Wisconsin (2006-2007). Entre 2008 y 2009: Director de Medicina de la Universidad Europea de Madrid, impulsando la acreditación y desarrollo de su nueva titulación de Medicina.

Profesor de Nefrología de la Universitat Autónoma de Barcelona (2010-2021) y Coordinador del Grup de Recerca en Nefropaties del Instituto Hospital del Mar de Investigación Médica (2010-2021).

Investigador principal de proyectos de investigación competitivos financiados por instituciones públicas (ISCIII) y privadas y de un gran número de ensayos clínicos.

Más de 200 conferencias invitadas en los más diversos foros nacionales e internacionales y más de 1000 Comunicaciones a Congresos. Autor de más de 140 monografías o capítulos de libros y 340 trabajos publicados en revistas indexadas (excluyendo cartas al editor), con más de 11500 citaciones y h-index de 50.

Actualmente es miembro del grupo Kidney Disease Improving Global Outcomes (KDIGO) para la elaboración de guías internacionales de trasplante renal.

Es Editor-in-Chief de la revista Transplantation Reviews, Editor de la Sección de Trasplante de la Revista Española de Nefrología y miembro del Comité de Redacción o Editorial de diversas revistas científicas nacionales e internacionales.

**PÉREZ-GARCIA, RAFAEL**

Hospital Universitario Infanta Leonor. Madrid. Universidad Complutense de Madrid.

Licenciado en Medicina y Cirugía por la Universidad Complutense de Madrid en 1974. Grado de la Licenciatura con calificación de sobresaliente en la Universidad Autónoma de Madrid, 1978. Especialista en Medicina Interna por la UCM, 1977. Especialista en Nefrología por la UAM, 1978. Grado de Doctor “CUM LAUDE”. Tesis Doctoral "Metabolismo Renal y Amoniogénesis en la Acidosis Láctica Hipóxica y su recuperación en el perro". Directores: F. Valderrábano y L. Hernando. UAM, 1989. Profesor Asociado de Medicina, 1994 a 2018. Departamento de Medicina UCM. Médico adjunto del Hospital General Universitario Gregorio Marañón de Madrid desde 1978 hasta 1985. Jefe Clínico del Servicio de Nefrología desde 1985 hasta 2008. Medico Consultor Senior. Nivel V de la Carrera profesional HGUGM. Jefe Unidad de Nefrología del Hospital Universitario Infanta Leonor. Madrid, 2008 - 2018. Publicaciones de artículos en revistas científicas indexadas: 208; comunicaciones y ponencias a Congresos: 567 y capítulos en libros de medicina: 53. Miembro de varios tribunales y comisiones hospitalarias: Investigación (HGUGM y HUIL); infecciones (HGUGM). Evaluador del FIS. Miembro de la Comisión Científica del ICOMEM. Coordinador de 24 trabajos multicéntricos españoles e internacionales. Fundador del Club de Nefropatología y de Registro Español de Gomerulonefritis (S.E.N.). Investigador principal o asociado en 6 proyectos FIS. Secretario y Vicepresidente de la Soc. Española de Nefrología (S.E.N). Vicepresidente de la SOMANE Sociedad Madrileña de Nefrología. Presidente del tribunal de la OPE de Nefrología la CAM 2010-2012. Codirector y profesor de tres Magíster de Medicina en la UCM. Servicio de Nefrología del HUIL: TOP 20 2015.

**PEREIRA-GARCÍA, MÓNICA**

Fundación Jiménez Díaz. Madrid

Graduado en enfermería. Experto en hemodiálisis para enfermería.

Supervisora de Enfermería de la Unidad de Diálisis FRIAT- FJD.

Tutor Principal de Prácticas Clínicas de la UAM.

Profesor en el “Experto Universitario en hemodiálisis para Diplomados en Enfermería”

Evaluador de trabajos científicos presentados a Congresos de la SEDEN.

Diversas publicaciones en revistas de nefrología.

**PRIETO-VELASCO, MARIO**

Doctor en Medicina por la Universidad de Cantabria. Jefe de la Unidad de Nefrología del Hospital Universitario de León. Miembro-Coordinador del grupo ERCA de la S.E.N. Miembro-coordinador del proyecto ACERCA de la S.E.N.

**PULIDO PULIDO, JUAN FRANCISCO**

Diploma universitario en Enfermería por la Universidad Autónoma de Madrid en la Escuela Universitaria “Jiménez Díaz” de Madrid, 1991/1994.

Enfermero en el Servicio de Nefrología en todas sus áreas (Hospitalización, Trasplante, Hemodiálisis Ambulatoria, Aislados y Agudos, Diálisis Peritoneal y Aféresis Terapéutica) del Hospital General Universitario Gregorio Marañón de Madrid desde octubre de 1995 a febrero de 2011.

Jefe de Unidad de Enfermería del Servicio de Nefrología del Hospital General Universitario Gregorio Marañón de Madrid desde febrero de 2011 hasta la actualidad.

Presidente de la Sociedad Española de Enfermería Nefrológica (SEDEN) desde noviembre de 2018.

Miembro de la Sociedad Española de Enfermería Nefrológica (SEDEN) desde 1995 hasta la actualidad con número de socio: 3064.

Miembro del grupo de profesores de la Sociedad Española de Enfermería Nefrológica (SEDEN) desde 2002 hasta 2018.

Profesor de la escuela de Ciencias de la Salud desde el 2004 hasta la actualidad.

Miembro del Consejo Editorial Nacional de la Revista Enfermería Nefrológica de la Sociedad Española de Enfermería Nefrológica desde el 2008 hasta la actualidad.

Nombrado por la Universidad Complutense de Madrid a propuesta de la Escuela Universitaria de Enfermería, Fisioterapia y Podología “Enfermero Colaborador de Docencia Práctica” del departamento de Enfermería.

Profesor del Master de Aféresis Terapéutica de la Universidad Complutense de Madrid.

Profesor del Master de Hemodiálisis de la Universidad Complutense de Madrid.

Miembro del Grupo de Trabajo “Grupo Enfermero de Trabajo de Enfermedad Inflamatoria Intestinal (GETEII).

Profesor del curso “Especialista en Enfermería Nefrológica”, de la Universidad Jaume I de Castellón.

Autor de distintos trabajos científicos, así como de artículos y capítulos de libros, todos ellos relacionados con la Nefrología.

Autor de distintas ponencias en congresos, jornadas, seminarios y simposium.

**SÁNCHEZ ÁLVAREZ, JOSÉ EMILIO**

Hospital Universitario de Cabueñes. Gijón.

Titulaciones Académicas:Universidad de Oviedo. Licenciado en Medicina y Cirugía (Universidad de Oviedo). Doctor en Medicina (Universidad de La Laguna).

Experiencia Profesional: Puesto actual: Jefe de Servicio de Nefrología. Hospital Universitario de Cabueñes. Puestos previos: Facultativo Especialista del Área de Nefrología; Hospital Universitario Central de Asturias (2007-2018). Facultativo Especialista del Área de Nefrología; Hospital del Oriente de Asturias (2006-2007). Nefrólogo del grupo Hospiten (1997-2006).

Formación: Máster de Enfermedad aterotrombótica y diagnóstico mediante técnicas no invasivas, Título máster. Universidad de Lérida (curso 2013-2014). Magíster cardio-renal. Universidad Complutense de Madrid (curso 2011-2012). Bases de planificación y administración sanitaria, Título máster. Universidad Nacional de Educación a Distancia - U.N.E.D. (curso 2004-2005).

Publicaciones: Numerosas publicaciones en el campo de la diálisis peritoneal, la epidemiología de la Enfermedad renal y las alteraciones del metabolismo óseo y mineral.

**SÁNCHEZ HERNÁNDEZ, ROSA**

Hospital General de Villalba. Madrid.

Médico Especialista en Nefrología vía MIR en el Hospital 12 de Octubre( Madrid).

Jefe de Servicio de Nefrología Hospital general de Villalba Madrid.

Especialista en Cuidados de Soporte y Paliativos mediante Master en Universidad Autónoma de Madrid.

Master en Ecografía y Nefrología intervencionista Universidad de Alcalá de Henares.

Ex Miembro -Coordinadora del comité de selección de la Sociedad Española de Nefrología durante 2 candidaturas.

Organizadora de los de Cursos de Cuidados Paliativos en la ERCA.

Organizadora de los Cursos de Nefrovascular.

Responsable del grupo de cuidados paliativos de la S.E.N.

Coresponsable Grupo Nutrición S.E.N.

Co editora del Libro Cuidados paliativos renales en la ERCA 1ª edición 2018 S.E.N/SECPAL.

**REVISORES**

**MARTÍN DE FRANCISCO HERNÁNDEZ, ÁNGEL**

Universidad de Cantabria. Santander.

Council European member 1998-2002). Presidente S.E.N. 2002-2008.

KDIGO Excecutive membre 2010-2014. Servicio de Nefrología (Diálisis) Hospital Universitario Marqués de Valdecilla Santander (hasta 2017).

Grupo Onconefrología S.E.N.

**MARTÍN MALO, ALEJANDRO**

Hospital Universitario Reina Sofía Universidad de Córdoba.

Licenciatura de Medicina en la Universidad de Navarra 1976. Tesis Doctoral Cum Laude en la Universidad de Córdoba 1987. M.I.R. Nefrología en Clínica Puerta de Hierro 1980. Jefe de Sección Nefrología Hospital Universitario Reina Sofía y Catedrático de Medicina de la Universidad de Córdoba. Investigador principal del IMIBIC. Sexenios de investigación reconocidos por la CNEAI: 6/6. Tramos Autonómicos 5/5. h-index (factor h) 38 (wos); h-index 45 Google Scholar Citation. Estancias en centros extranjeros, Universidad de Londres (Inglaterra), Saint Peter's Hospital 1985; Research Associate Universidad de California Los Angeles (UCLA), USA. Publicaciones 191, Capítulos de libros/Monografías 85. Comunicaciones a Congresos 519, Conferencias Invitadas 159. Congresos como chairman/moderador 67. Premios de investigación 25. Proyectos de investigación subvencionados instituciones públicas/privadas 39, en 20 como investigador principal. Miembro del Comité de las European Best Practice Guidelines for Hemodialysis. Guías Básicas sobre Metabolismo Mineral en el Enfermo Renal. Miembro de varios Steering Committee. Asesor de multinacionales relacionadas con el sector sanitario. Revisor de múltiples revistas indexadas, de Congresos científicos Internacionales y de agencias de evaluación

**DÍAZ-TEJEIRO IZQUIERDO, RAFAEL**

Complejo Hospitalario Universitario de Toledo.

Licenciado en Medicina y Cirugía por la Universidad Complutense de Madrid en el año 1981. Grado de doctor por la Universidad de Navarra con la calificación de Apto “Cum-Laude” en 1989. Se especializó vía MIR en Nefrología en la Clínica Universitaria de Navarra entre los años 1985 y 1989.

Médico adjunto en el Hospital Virgen de la Salud de Toledo desde 1989 hasta 2018 y desde enero 2019 hasta la actualidad ejerce su labor profesional como jefe del Servicio de Nefrología del mismo hospital.

Título de Experto en Hemodiálisis expedido por la Facultad de Medicina de la Universidad Complutense de Madrid (2005), Master Universitario en Enfermedad aterotrombótica y diagnóstico mediante técnicas no invasivas impartido por la Universidad de Lleida (2012-2013), y Master Universitario en Nefrología Diagnóstica e Intervencionista impartido por la Universidad de Alcalá de Henares (2015).

Profesor del Magister de Experto en Hemodiálisis en el capítulo de controversias del acceso vascular desde el año 2009 hasta la actualidad. Ha impartido numerosos talleres y cursos sobre el uso de la ecografía en el acceso vascular. Profesor del taller de Ecografía: Una herramienta enfermera en el manejo del acceso vascular, del Congreso de la SEDEN. Toledo 2014 y del taller Ecodoppler del acceso vascular del curso “Carlos Caramelo” de actualización en diálisis adecuada, Fundación Jiménez Díaz. Madrid 2010 y 2011. Profesor en la 1ª Jornada de Enfermedad renal crónica sobre Ecografía doppler para Nefrólogos: Planificación, implantación y seguimiento de los accesos vasculares. Alcázar de San Juan 2011. En la actualidad, co-organizador y profesor del Curso Teórico-práctico para el uso de la Ecografía en la unidad de hemodiálisis entre los años 2016 y 2019. Presentación de más de 80 comunicaciones en congresos nacionales e internacionales y más de 30 publicaciones y capítulos de libros en revistas nacionales e internacionales.

**FERNÁNDEZ LUCAS, MILAGROS**

Hospital Universitario Ramón y Cajal. Madrid.

Jefe de Servicio de Nefrología, Hospital Universitario Ramón y Cajal, Madrid. Profesora Asociada Universidad de Alcalá.

Experta en Técnicas de Hemodiálisis y manejo multidisciplinar de la Enfermedad Renal Crónica.

**GUTIÉRREZ MARTÍNEZ, EDUARDO**

Hospital Universitario 12 de Octubre. Madrid.

Current appointments: Hospital 12 de Octubre. Department of Nephrology. Universidad Complutense. Madrid, Spain.

Qualifications: Staff Division of Nephrology, Hospital 12 de Octubre. Contributor Proffesor of Medicine, Universidad Complutense, Madrid. M.D.

Previous appointments (indicate years held):

Staff Division of Nephrology, Hospital 12 de Octubre (2004- ). Staff Division of Nephrology, Hospital Virgen de la Salud and Hemodyalisis Unit “Nuestra Señora del Rosario” (2003-2004).

Contributor Proffesor of Medicine, Universidad Complutense, Madrid. (2009-2011)

Current research grants (indicate role, years and value):

- Carlos III Institute, Fondo Investigaciones Sanitarias, Health Ministry of Spain. Clinicopathologic correlations in IgA nephropathy. Years 2013-2014. Value 50.000 Euros. Principal Investigator (IP). Extended.

Previous relevant research grants (indicate role, years and value):

- Carlos III Institute, Fondo Investigaciones Sanitarias, Health Ministry of Spain. Clinicopathologic correlations in IgA nephropathy. Years 2010-2012. Value 50.000 Euros. Principal Investigator (IP).
- Grants for Independent Clinical Investigation, Health Ministry of Spain. Antiproteinuric effect of diuretics, a prospective clinical study. Years: 2010-2013. Value 75.000 Euros. Collaborator Investigator

H-Index: 19 (Web of Science). Indexed publications: 142.

**MUÑOZ GONZÁLEZ, ROSA INÉS**

Hospital Universitario de Basurto, Bilbao.

Licenciada en Medicina y cirugía por la Facultad de Medicina de la Universidad de Salamanca en 1985. Estudios de doctorado en la Universidad del País Vasco 1992-94. Título de médico especialista en nefrología, por el Hospital Universitario Cruces Vizcaya, de marzo de 1989 a diciembre de 1992.

MIR de nefrología en el Hospital de Cruces (1989-1992). Facultativo especialista de nefrología de los hospitales Taxgorritu, Cruces y Basurto (1993-2001).

Facultativo especialista de nefrología del hospital de Galdakao (2001-2018). Unidad de Hemodiálisis con plaza de personal fijo estatutario en Osakidetza.

Facultativo especialista de nefrología del hospital universitario de Basurto (2018-actualidad) con plaza de personal fijo estatutario en Osakidetza.

Miembro de la Comisión Corporativa de farmacia de Osakidetza-Servicio Vasco de Salud. Desde el 31 de mayo de 2018 a febrero de 2019.

Presidente de la Sociedad Norte de Nefrología, desde noviembre de 2010 hasta noviembre de 2014. Puesto electo por votación nefrólogos de 4 comunidades autónomas.

Tutora de residentes de Nefrología del Hospital de Galdakao (2008-2018) con doble acreditación oficial del Departamento de Salud del Gobierno Vasco. Profesora en magister en hemodiálisis de la Universidad Complutense de Madrid, cursos 2010-11, 2011-12, 2012-13, 2013-14, 2014-2015, 2015-2016, 2016-2017, 2017-2018, 2018-2019, 2019-2020.

Publicaciones en revistas: Hemodialysis International, Nephrol Dial Traspl, DPI, Nefrología. Capítulo libro: Technical problems in patients on hemodialysis. ISBN978-953-307-403-0. 2011.

Más de 40 comunicaciones a congresos naciones y más de 10 a internacionales. Monografías en enfermedad renal crónica y charlas en reuniones científicas: S.E.N, SEDYT, SNN.

Miembro del Comité Editorial Nacional de la revista Diálisis y Trasplante desde 2009.

**OJEDA LÓPEZ, RAQUEL**

Hospital Universitario Reina Sofía de Córdoba.

Nefróloga, dedicada a la Diálisis íntegramente, principalmente a la Hemodiálisis, pero sin olvidarme de la diálisis peritoneal, consulta de Enfermedad Renal crónica terminal, y diálisis de pacientes agudo. Muestra de ello son los trabajos/publicaciones que ha liderado y/o en los que ha participado.

Periodo de formación MIR en nefrología: *Hospital Universitario Reina Sofía de Córdoba: Julio-2001/Julio-2005.

Experiencia asistencial: 2.1.-*Facultativa especialista del área de nefrología (1/11/2005 to 1/1/2013) en el Hospital Universitario Reina Sofía de Córdoba. 2.2.-Nefróloga-Especialista en diálisis (14/01/13 to 30/04/2018) en el Servei de Nefrologia i Trasplantament Renal del Hospital Clínic i Provincial. Barcelona.

Facultativa especialista de área de nefrología (1/05/2018 hasta la fecha actual) en el Hospital Universitario Reina Sofía de Córdoba. 3.-Artículos científicos. 3.1.- Xipell M, Montagud-Marrahi E, Rubio MV, Ojeda R, Arias-Guillén M, Fontseré N, Rodas L, Vera M, Broseta, JJ, Torregrosa V, Filella X, Maduell F. Improved Control of Secondary Hyperparathyroidism in HemodialysisPatients Switching from Oral Cinacalcet to Intravenous Etelcalcetide, Especially in Nonadherent Patients. -Blood Purif. 2019 Jan 30:1-9.//2.- -Salcedo C, Joubert PH, Ferrer MD, Canals AZ, Maduell F, Torregrosa V, Campistol JM, Ojeda R, Perelló J. A phase 1b randomized, placebo-controlled clinical trial with SNF472 in haemodialysis patients. Br J Clin Pharmacol. 2019 Apr; 85(4):796-806.

**RODRÍGUEZ BENÍTEZ, PATROCINIO**

Hospital General Universitario Gregorio Marañón. Madrid.

Especialista en Nefrología y en Medicina Familiar y Comunitaria.

Como docente, soy profesora colaboradora de alumnos de 5º curso de Medicina, de la U. Complutense de Madrid, en la asignatura de Nefrología y colaboro activamente en docencia práctica de los residentes, tanto de Nefrología como de otras especialidades, desde 2005 hasta la actualidad. Participo como profesor en tres Máster de la universidad complutense: Magister en Hemodiálisis para especialistas en Nefrología, Magister en Hemodiálisis para Enfermería y Magister en Aféresis terapéutica. Y en las ediciones en que estuvo activo, en el Magíster Cardiorrenal. En los últimos años, se me ha invitado a participar como ponente en distintos Congresos Nacionales de la Sociedad Española de Nefrología y en Reuniones de la Sociedad Madrileña de Nefrología, así como en otros cursos y reuniones sobre FRA y manejo con depuración extrarrenal de pacientes sépticos y críticos.

Como investigador clínico, he participado en 42 artículos en revistas nacionales. 18 artírculos en revistas internacionales. 28 resúmenes publicados en revistas nacionales. 120 presentaciones a congresos a nivel nacional y 12 ponencias en Congresos internacionales. Participación en más de 30 ponencias, mesas redondas y conferencias. 26 capitulos de libros referentes al campo de la Nefrología.

He participado en 8 Proyectos de investigación: Todos ellos relacionados con el FRA. En dos de ellos como investigadora principal.

**SÁENZ SANTOLAYA, ALFREDO JOSÉ**

Hospital Universitario Infanta Leonor. Madrid

Diplomado en Enfermería por la Universidad de Valladolid, Campus de Soria.

Adjunto a la Dirección de Enfermería a cargo del Consultorio Avd. Aragón, Madrid

Responsable de Enfermería, Equipo Atención Primaria, CS Avd. Aragón.

Coautor de la “Guía de Prevención y Manejo de las Úlceras de la Piel” Área 4 AP, Madrid. Experto Universitario en Hemodiálisis para DUE, Universidad Complutense, Curso 2008-2009. Docente en el “Máster en Hemodiálisis para Enfermería” U. Complutense, Cursos 2015-2020. Tutor Práctica Clínica para alumnos pre grado de la U. Nebrija, U. Europea, U. Complutense.Tutor Práctica Clínica para alumnos “Máster en Hemodiálisis para Enfermería” U. Complutense.

Coautor del Premio Covidien Quinton 2010 sobre Catéteres Permanentes. Autor del trabajo premiado con el Accésit del Premio Janssen de investigación en Enfermería Nefrológica 2012. Coautor del trabajo premiado con el Segundo Premio Póster Fresenius Medical Care 2014. Coautor de varias Comunicaciones Orales y Póster presentadas en los congresos de la SEDEN. Coautor de varios artículos publicados en la revista de la SEDEN.

Docente en el curso “Cuidados Integrales al paciente con Enfermedad Renal Crónica” organizado por la Gerencia Asistencial AP ediciones 2015 y 2016.

**SLON ROBLERO, MARÍA FERNANDA**

Complejo Hospitalario de Navarra. Pamplona.

Especialidad de Nefrología en el Departamento de Nefrología de la Clínica Universidad de Navarra.

Médico adjunto del Servicio de Nefrología del Complejo Hospitalario de Navarra desde Mayo 2010 hasta el momento actual.

Responsable de la Unidad de Diálisis Domiciliaria del Servicio de Nefrología del Complejo Hospitalario de Navarra.

Participante de las Controversias KDIGO Controversies Conference on Dialysis Initiation, Modality Choice and Prescription (Madrid Enero 2018).

Miembro del Comité Científico del REER (Registro Español de enfermos renales) desde Julio 2019.

Responsable del Registro REER y del Registro ERA-EDTA de enfermos renales de Navarra.

Vocal del grupo de trabajo de la S.E.N.: "Apoyo y promoción de la hemodiálisis domiciliaria en España".

Co-investigador en el área de las enfermedades cardiovasculares y renales del Instituto Navarro para la Investigación de la Salud (IDISNA).

Profesor Clínico Asociado de la Facultad de Medicina de la Universidad de Navarra.

**TORNERO MOLINA, FERNANDO**

Hospital Universitario del Sureste. Arganda del Rey.

Jefe de Sección de Nefrología del Hospital Universitario del Sureste. Previamente FEA y posteriormente Jefe de Sección de Nefrología del Hospital Virgen de la Luz de Cuenca y FEA del Hospital Clínico de San Carlos. Especialidad vía MIR en Hospital Clínico de San Carlos. Profesor asociado de Medicina de la Universidad Europea de Madrid y de la Universidad Complutense de Madrid y Profesor colaborador de prácticas de la Universidad Francisco de Vitoria y Profesor colaborador de prácticas de Ingeniería biomédica de la Universidad Rey Juan Carlos. Profesor de los Master "Experto en hemodiálisis para especialistas en Nefrología", "Sindrome Cardiorrenal" y “Atención Integral al paciente con enfermedad crónica avanzada y necesidades paliativas”. Profesor del curso Toledo Diálisis para Residentes de Nefrología. Director y Profesor del curso Formativo en Diálisis Peritoneal para Residentes de Nefrología. Presidente y Miembro fundador de la Sociedad Castellanomanchega de Nefrología, Tesorero y, posteriormente, presidente de la Sociedad Madrileña de Nefrología. Coordinador del grupo de trabajo de Nefrología Geriátrica de la Sociedad Española de Nefrología. Autor de 40 publicaciones, 28 capítulos de libros, 180 comunicaciones a Congresos, 120 ponencias a Congresos Científicos.

- 1. Anexo 2: Declaración de conflictos de interés

DECLARACIÓN DE CONFLICTOS DE INTERÉS

El Dr. Guillermo Alcalde Bezhold declara que no tiene conflictos de interés.

El Dr. Roberto Alcázar Arroyo declara que ha recibido aportaciones económicas de la Fundación Renal Íñigo Álvarez de Toledo en concepto de Asesoría científica, no relacionadas con la realización del trabajo.

El Dr. Manuel Angoso de Guzmán declara que no tiene conflictos de interés.

La Dra. Marta Arias-Guillén declara que no tiene conflictos de interés.

La Dra. María Dolores Arenas Jimenez declara que no tiene conflictos de interés.

La Dra. Patricia Arribas Cobo, declara que no tiene conflictos de interés.

La Dra. Patricia de Sequera declara que no tiene conflictos de interés.

La Dra. María Dolores Del Pino Pino declara que no tiene conflictos de interés.

El Dr. Juan Manuel Díaz declara que no tiene conflictos de interés.

El Dr. Rafael García Maset declara que no tiene conflictos de interés.

El Dr. Emilio González Parra declara que no tiene conflictos de interés.

El Dr. Domingo Hernández Marrero declara que no tiene conflictos de interés.

El Dr. José Antonio Herrero Calvo declara que no tiene conflictos de interés.

El Dr. Francisco Maduell declara que no tiene conflictos de interés.

El Dr. Pablo Molina declara haber recibido compensación económica por Consultoría de Palex y Medtronic.

El Dr. Manuel Molina Núñez declara que no tiene conflictos de interés.

El Dr. Alfonso Otero González declara que no tiene conflictos de interés.

El Dr. Julio Pascual Santos declara que no tiene conflictos de interés.

El Dr. Rafael Pérez García declara que no tiene conflictos de interés.

La Dra. Mónica Pereira García declara que no tiene conflictos de interés.

El Dr. Mario Prieto-Velasco declara que no tiene conflictos de interés.

El Dr. Juan Francisco Pulido Pulido declara que no tiene conflictos de interés.

El Dr. José Emilio Sánchez Álvarez declara que no tiene conflictos de interés.

La Dra. Rosa Sánchez Hernández declara que no tiene conflictos de interés.

- 1. Anexo 3: Solicitud de atención sanitaria de diálisis de forma temporal

| **SOLICITUD DE ATENCIÓN SANITARIA DE DIÁLISIS DE FORMA TEMPORAL**  Fecha:  **Datos de filiación del paciente**   - Nombre completo: - Número de Seguridad Social u otro tipo de cobertura: - Teléfono/s de contacto (personal y familiar): - Fax y/o correo electrónico:   **Datos del centro de procedencia**   - Centro de Diálisis u hospital de procedencia (Teléfono de contacto, FAX o dirección de correo electrónico). - Aislamiento de pacientes con VHC por salas o turnos.   **Solicitud**   - Periodo para el que solicita asistencia de diálisis: - Motivos del traslado: - Dirección postal y teléfono durante su estancia: - Turno habitual de diálisis: - Necesidad de transporte sanitario y tipo:   **Datos médicos de interés**   - Alergias: - Incluido/excluido de Lista de Espera de Trasplante y Centro de trasplante de referencia: - Tipo de acceso vascular: - Otras Infecciones potencialmente contagiosas: - Condiciones especiales: incremento/disminución en el número de diálisis semanales sobre 3, incremento en el tiempo de diálisis sobre 4 horas, necesidad de cama, dificultades especiales clínicas, estancia reciente en agudos o transfusión reciente. - Hoja de Serología: La antigüedad máxima de estas determinaciones será de 3 meses (se pretende determinar las condiciones del paciente no solo para conocer los pacientes potencialmente infecciosos, sino a quien tenemos que proteger si nos viene de vacaciones a nuestra unidad de HD).   Marque con una cruz en la zona sombreada que corresponda y acompañe de volante de microbiología.   | 1 | Ac anti-VIH | Positivo |  | Carga Viral + |  | | | --- | --- | --- | --- | --- | --- | --- | | Carga Viral - |  | | | Negativo |  |  | | | |  |  | | | | | | | 2 | Ag HBs | Negativo |  | Ac anti VHBs+ | AcHBcore + |  | | Ac HBcore neg |  | | Positivo |  |  | | | |  |  | | | | | | | 3 | Ac anti -VHC | Negativo |  |  | | | | Positivo |  | RNA + |  | | | RNA negativo | Tratado con RVS mayor 6 meses no infectivo para genotipo tratado |  | | Que ha perdido RNA de forma espontánea. |  |   Solo los pacientes en negrita (AgHBs positivo) requiere aislamiento en sala específica para ellos. El resto SOLO necesitan mantener SIEMPRE y de forma ESTRICTA las precauciones universales.  Consensuado en el grupo de virus (mayo 2018).  Dn................................................. Dr. .............................................................  Firmado en .............., a ........ de ........... de .............. |
| --- | --- | --- | --- | --- | --- | --- | --- | --- | --- | --- | --- | --- | --- | --- | --- | --- | --- | --- | --- | --- | --- | --- | --- | --- | --- | --- | --- | --- | --- | --- | --- | --- | --- | --- | --- | --- | --- | --- | --- | --- | --- | --- | --- | --- | --- | --- | --- | --- | --- | --- | --- | --- | --- | --- | --- | --- | --- | --- | --- | --- |

- 1. Anexo 4: Informe clínico médico

| INFORME CLÍNICO MÉDICO  El informe clínico debe ser detallado, en él se describirán los siguientes aspectos:   1. ANTECEDENTES FAMILIARES 2. ANTECEDENTES PERSONALES  - Alergias - Hábitos tóxicos (tabaco, alcohol, otras drogas). - Evaluación de riesgo cardiovascular (HTA, DM, hábitos tóxicos, dislipemia…). - Antecedentes quirúrgicos, ingresos hospitalarios, patología a diferentes niveles: neumológica, digestiva, cardiológica, vascular, etc.). - Serología vírica completa y estado de vacunación.   Se considera conveniente reseñar datos de la situación laboral, el nivel de estudios y el apoyo familiar   1. ANTECEDENTES NEFROUROLÓGICOS:   Se describirá la patología renal que le ha conducido a diálisis, así como la evolución y el tiempo de seguimiento por el nefrólogo.   1. EXPLORACIÓN FÍSICA:   Debe ser reciente (máximo de tres meses previos).  Se cumplimentarán cada uno de los siguientes apartados, que definen la situación actualizada del paciente, así como la patología que presenta a estos niveles:   - ACCESO VASCULAR: se describen los accesos vasculares del paciente, la fecha de realización, los catéteres venosos centrales que ha tenido y las complicaciones derivadas de los mismos. - SITUACIÓN HEMATOLÓGICA y TRANSFUSIONES SANGUÍNEAS. - SITUACIÓN CARDIOVASCULAR. - SITUACIÓN DIGESTIVA, haciendo especial hincapié en la serología vírica. - SITUACIÓN NEUMOLÓGICA. - SITUACIÓN NEUROLÓGICA. - COMPLICACIONES INFECCIOSAS. - OSTEODISTROFIA RENAL. - SITUACIÓN RESPECTO A LA LISTA DE TRASPLANTE RENAL. - EXPLORACIONES COMPLEMENTARIAS. - ÚLTIMA ANALÍTICA. - ÚLTIMA SEROLOGÍA VÍRICA (detallando la fecha y con una antigüedad máxima de 3 meses).  1. PAUTA DE HEMODIÁLISIS ACTUALIZADA (Si se completa en el informe de enfermería, adjunto, se puede obviar).   Esta incluirá: duración de las sesiones; turno y días (frecuencia); tipo de técnica (HD, HDF, HDF-OL); dializador (marca, modelo, membrana, superficie, método de esterilización); flujo de sangre; características del líquido de diálisis (LD), conductividad y temperatura del mismo; flujo del LD; tipo de acceso vascular actual y forma de utilización; anticoagulación; peso seco; tolerancia habitual a la técnica; presión arterial pre y postdiálisis. Otra información relevante sobre las diálisis.  7. TRATAMIENTO: INTRADIALÍTICO Y GENERAL.  8. SITUACION ACTUAL: se hará un breve resumen de los problemas actuales más importantes del paciente que puedan suponer una incidencia durante su estancia en el centro de desplazamiento.  Dr. .............................................................  Firmado en .............., a ........ de ........... de .............. |
| --- |

- 1. Anexo 5. Informe de enfermería

| INFORME DE ENFERMERÍA  Dº...............................................N.º historia:......................................... N.º SS .......................................  Fecha ........................................Hospital de procedencia.........................................................................  Serología:  Alergias:  Teléfono de contacto: Tfno. familiar:  Situación familiar: nivel cultural, lectoescritura  Está en lista Tx renal:  Situación emocional ante la sesión de HD:  Nivel de dependencia:  Recomendaciones:  Técnica de diálisis:  Diálisis semanales: Días habituales: Tiempo de diálisis:  Dializador: Líquido de diálisis: Flujo de baño:  Anticoagulación:  Peso pre-diálisis: Ganancia intradiálisis:  Función renal residual:  Ultrafiltración máxima tolerada (ml/h):  Situación nutricional:  Cuidados dietéticos:  Ingesta intradiálisis:  Recomendaciones:  Medicaciones intradiálisis precauciones especiales:  Acceso vascular: Tipo ...............................................   - Calibre habitual de las agujas: - Cuidados especiales. - Autocuidados: - Sellado anticoagulante (en caso de catéter permanente): - Flujo sanguíneo de extracción habitual: - Presión venosa con dicho flujo: - Problemas más habituales: problemas de hemostasia; material y tiempo para la hemostasia; anestésicos locales.   Diagnósticos:  Otros cuidados de enfermería:  Teléfono y nombre enfermera referencia:  Respecto a la medicación, lo adecuado sería que llevase la medicación estimulante de la eritropoyesis y el Fe iv, para todo el periodo de desplazamiento, salvo incidencias.  Lda: .............................................................  Firmado en .............., a ........ de ........... de .............. |
| --- |

- 1. Anexo 6: Documento de aceptación/denegación de pacientes desplazados

| DOCUMENTO DE ACEPTACIÓN/DENEGACIÓN DE PACIENTES DESPLAZADOS  Se adaptará a los requerimientos específicos de cada comunidad en lo referente a documentación administrativa a aportar y transporte.  Fecha:  Para:  A l A: (Médico, enfermera o administrativa)  Centro Diálisis Origen:  Mail/ FAX:  De:  Dr/a.: (Médico, enfermera o administrativa)  Centro Diálisis Destino  Mail/ FAX/ teléfono de contacto  CONFIRMACIÓN  Confirmamos la plaza de diálisis para el paciente: …..................................................... desde el día……...... al día.……… (ambos inclusive) en el centro de diálisis…. (poner centro y dirección).  El turno asignado es:………………………………………/ Nos resulta imposible, en este momento, asignarle un turno concreto. Le rogamos se ponga en contacto con nosotros más próximo a las fechas de su viaje.  Acudirá al centro a las…………….. horas; preguntar por………en……………..( datos de ubicación de la unidad)  Deberá remitir con unos 10 días de antelación la autorización por parte del hospital de referencia o compañía aseguradora.  Les rogamos que nos aporten a su llegada un Informe Médico y de Enfermería completo reciente, incluyendo la Pauta de Diálisis, el Tratamiento Médico, Serologías Víricas recientes y Analíticas ordinarias (Ver recomendaciones de la Guía de la SEN de Centros de Diálisis).  El paciente deberá traer consigo cualquier medicación de uso hospitalario (Eritropovetina, Calcitriol, etecalcetida, etc.) y la autorización de las diálisis por parte de la Seguridad Social o su Centro de Referencia indicando claramente la fecha de inicio y de fin de las diálisis en nuestro centro.  En este momento no tenemos capacidad para poder proporcionar el transporte al paciente, en caso de ser posible el transporte se le comunicará  Un saludo,  DENEGACIÓN  Lamentamos comunicarle que en este momento no podemos confirmar su plaza de diálisis en nuestro centro por falta de disponibilidad en las fechas que usted solicita.  Lamentamos lo inconvenientes que esto le pueda ocasionar  Si lo desea, vuelva a contactar con nosotros en otras fechas.  Un saludo,  Dn................................................. Dr. .............................................................  Firmado en ..............,a ........ de ........... de .............. |
| --- |

- 1. Anexo 7: Indicadores globales

|  | Fórmula | Frecuencia | Estándar |
| --- | --- | --- | --- |
| Prevalencia de periodo HD | Suma de pacientes prevalentes a 31 de diciembre del periodo de estudio + bajas en HD.  NOTA: Bajas en HD = (éxitus + trasplantados + traslados + recuperación función renal). | Anual |  |
| Tasa Bruta de Mortalidad | *Numerador:* 100 x número de muertes durante el periodo de estudio.  *Denominador:* prevalencia de periodo en HD. | Anual |  |
| Mediana del Índice de Charlson modificado | Calculado durante el primer mes de tratamiento, de todos los pacientes incidentes. | Anual |  |

**Anemia**

| Porcentaje de pacientes con hemoglobina objetivo | *Numerador:* número de pacientes del denominador con Hb media > 11 ,0 g/dl < 12.0 g/dl durante el período de estudio.  *Denominador:* número de pacientes en HD (durante al menos 4 meses), prevalentes del período de estudio. | Mensual | Por definir |
| --- | --- | --- | --- |
| Porcentaje de pacientes con ferritina en rango óptimo 100-500 microgr/l) | *Numerador:* 100 x número de pacientes con ferritina (cifra media si más de un valor) entre 100 y 500 microgr/l en el periodo de estudio.  *Denominador:* número de pacientes prevalentes del periodo de estudio | Mensual | > 80 % |
| Porcentaje de pacientes con Hb < 11 g/dl sin AEE | *Numerador:* 100 x número de pacientes con la Hb< 11g/dl del periodo de estudio.  *Denominador:* número de pacientes prevalentes del periodo de estudio. | Mensual | Por definir |
| Porcentaje de pacientes con Hb > 13 g/dl sin AEE | *Numerador:* 100 x número de pacientes con la Hb> 13 g/dl del periodo de estudio  *Denominador:* número de pacientes prevalentes del periodo de estudio. | Mensual | Por definir |

**Diálisis adecuada**

| Porcentaje de pacientes prevalentes con KT/V objetivo que lleven en HD más de 91 días y que se dializan 3 veces por semana Daugirdas II | *Numerador:* 100 x número de  pacientes del denominador con*spKT/V medio de periodo > 1.4 (eKT/V 1.2).    *Denominador:* Número de pacientes prevalentes de periodo, que lleven en HD > 3 meses y que se dializan 3 veces por semana. | Bimestral | > 88 % |
| --- | --- | --- | --- |
| Porcentaje de pacientes prevalentes con KT mínimo | *Numerador:* 100 x número de pacientes del denominador con Kt mínimo.  *Denominador:* Número de pacientes prevalentes de periodo, que lleven en HD > 3 meses y que se dializan 3 veces por semana. | Mensual | > 88 % |
| Porcentaje de pacientes prevalentes en HDF OL con Volumen de reposición recomendado | *Numerador:* 100 x número de pacientes con Volumen de reposición ≥ 21 Litros 100.    *Denominador:* Número de pacientes prevalentes de periodo, que lleven en Hemodiafiltración on- line (HDF OL) > 3 meses y que se dializan 3 veces por semana. | Mensual | > 88 % |

**Metabolismo óseo y mineral**

| Porcentaje de pacientes con PTH entre 150-500 pg/ml | *Numerador:* 100 x número de pacientes totales en el denominador con PTH entre 150 -500 pg/ml.  *Denominador:* Número de pacientes prevalentes del periodo. | Trimestral | > 30 % |
| --- | --- | --- | --- |
| Porcentaje de pacientes con fósforo sérico inferior a 5,5 mg/dl | *Numerador:* 100 x número de pacientes cuya media cuatrimestral de todas sus determinaciones de fósforo sea < 5,5 mg/dl.  *Denominador:* número de pacientes prevalentes en ese periodo. | Bimestral | > 50 % |

**Agua purificada**

| Conductividad del agua tratada | *Numerador:* 100 x número de determinaciones del denominador con valores < 5 microsiemens.  *Denominador:* número total de determinaciones de conductividad agua tratada en el periodo de estudio. | Mensual | > 80 % |
| --- | --- | --- | --- |
| Porcentaje cultivos de agua tratada con crecimiento de bacterias inferior al rango | *Numerador:* 100 x número de cultivos del agua tratada con crecimiento bacteriano < 50 UFC/ 100 ml.  *Denominador:* número de cultivos del agua tratada del periodo de estudio. | Mensual | 100 % |
| Niveles de Aluminio en agua tratada | *Numerador:* 100 x número de determinaciones de aluminio del agua tratada < 5 ug/l.  *Denominador:* número de determinaciones de aluminio en agua tratada del periodo de estudio. | Semestral | 100 % |
| Niveles de endotoxinas en el agua osmotizada (LAL) | *Numerador:* 100 x número de determinaciones de LAL con valores < 0,25 UE/ml.  *Denominador:* número total de determinaciones de LAL realizadas durante ese periodo. | Mensual | 100 % |

**Agua ultrapura**

| Conductividad del agua tratada | *Numerador:* 100 x número de determinaciones del denominador con valores < 5 microsiemens.  *Denominador:* número total de determinaciones de conductividad agua tratada en el periodo de estudio. | Mensual | > 80 % |
| --- | --- | --- | --- |
| Porcentaje cultivos de agua tratada con crecimiento de bacterias inferior al rango  ISO 1163: 2009 | *Numerador:* 100 x número de cultivos del agua tratada con crecimiento bacteriano < 10 UFC/100 ml.  *Denominador:* número de cultivos del agua tratada del periodo de estudio. | Mensual | 100 % |
| Niveles de Aluminio en agua tratada | Numerador: 100 x número de determinaciones de aluminio del agua tratada < 5 ug/l.  *Denominador:* número de determinaciones de aluminio en agua tratada del periodo de estudio. | Semestral | 100 % |
| Niveles de endotoxinas en el agua osmotizada (LAL)  ISO 1163: 2009 | Numerador 100 x número de determinaciones de LAL con valores < 0,03 UE/ml.  *Denominador:* número total de determinaciones de LAL realizadas durante ese periodo. | Mensual | 100 % |

**Líquido de diálisis ultrapura**

| Porcentaje cultivos líquido de diálisis ultra pura < 0,01 UFC/ml | *Numerador:* 100 x número de cultivos del agua tratada con crecimiento bacteriano < 0,01 UFC/ml.  *Denominador:* número de cultivos del agua tratada del periodo de estudio. | Mensual | 100 % |
| --- | --- | --- | --- |
| Niveles de endotoxinas en el Líquido de Diálisis Ultrapura (LAL) | *Numerador:* 100 x número de determinaciones de LAL con valores < 0,03 UE/ml.  *Denominador:* no total de determinaciones de LAL realizadas durante ese periodo. | Mensual | 100 % |

**Acceso vascular**

| Porcentaje de pacientes en los que se lleva un registro gráfico de zonas de punción durante las sesiones de hemodiálisis | *Numerador:* número de pacientes en HD en los que se registra las zonas de punción x 100.  *Denominador:* total de pacientes en HD en los que se está puncionando una FAV. | Trimestral | 100 % |
| --- | --- | --- | --- |
| Porcentaje de pacientes incidentes con acceso vascular utilizable | *Numerador:* 100 x número de pacientes con fístula arteriovenosa (FAV) autóloga o protésica utilizable.  *Denominador:* Número de pacientes incidentes en el periodo de estudio. | Anual | >75 % |
| Porcentaje de pacientes incidentes portadores de catéter venoso central (CVC), sin contraindicación para la realización de una fístula arteriovenosa, a los que se les realiza una fístula arteriovenosa antes de las 6 semanas desde que se implanta el catéter. | *Numerador:* número de pacientes incidentes sin contraindicación para FAV que inician programa de HD a través de un CVC y se les construye una FAV antes de 6 semanas x 100.  *Denominador:* número de pacientes incidentes sin contraindicación para FAV que inician el tratamiento de HD mediante CVC. | Mensual | >90 % |
| Porcentaje de pacientes prevalentes con más de 3 meses en programa de hemodiálisis que, a 31 de diciembre del año estudiado, se dializan a través de una fístula arteriovenosa nativa (FAVn) | *Numerador:* número de pacientes en programa de HD que se están dializando a través de una FAVn funcionante a 31 de diciembre del año estudiado x 100.  *Denominador:* número de pacientes con más de 3 meses en programa de HD a 31 de diciembre del año en curso. | Anual | >75 % |
| Porcentaje de pacientes prevalentes con más de 3 meses en programa de hemodiálisis que, a 31 de diciembre del año estudiado, se dializan a través de un catéter venoso central (CVC) tunelizado. | *Numerador:* número de pacientes en programa de HD que se están dializando a través de un CVC tunelizado (CVT) a 31 de diciembre del año en estudio x 100.  *Denominador:* número de pacientes con más de 3 meses en programa de HD a 31 de diciembre del año en curso | Anual | < 20 % |
| Tasa anual de trombosis de fístulas arteriovenosas nativas | *Numerador:* número de trombosis con FAVn en estudio al año.  *Denominador:* número total de pacientes/año con FAVn en el año de estudio | Anual | < 0.5 trombosis/paciente/año |
| Tasa anual de trombosis de fístulas arteriovenosas protésicas | *Numerador:* número de trombosis con FAVp en estudio al año.  *Denominador:* número total de pacientes/año con FAVp en el año de estudio.  *Unidades:* tasa. | Anual | < 0.50 trombosis/paciente/año |
| Porcentaje de fístulas arteriovenosas nativas (FAVn) trombosadas, reparadas endovascularmente, que siguen permeables a los 6 meses | *Numerador:* número de pacientes con una FAVn que sigue permeable tras rescate endovascular por trombosis a los 6 meses.  *Denominador:* número de pacientes con una FAVn que presentan una trombosis rescatada con técnicas intervencionistas radiológicas y llevan 6 meses de seguimiento. | Anual | >50 %  A los 6 meses |
| Porcentaje de fístulas arteriovenosas nativas (FAVn) trombosadas, reparadas quirúrgicamente, que siguen permeables al año | *Numerador:* número de pacientes con una FAVn que sigue permeable tras rescate quirúrgico por trombosis al año de seguimiento x 100.  *Denominador:* número de pacientes con una FAVn que presentan una trombosis rescatada quirúrgicamente y llevan año de seguimiento. | Anual | > 50 % |

**Enfermedades víricas**

| Tasa de seroconversión de VHC | *Numerador:* 100 x número de pacientes que positivizan el VHC en el periodo estudiado (Ac-VHC positivo y/o PCR positiva).  *Denominador:* número de pacientes en riesgo (con AcVHC y/o PCR-VHC negativos dializados en la unidad). | Anual | 0 % |
| --- | --- | --- | --- |

**Trasplante Renal**

| Porcentaje de pacientes remitidos para evaluación al Centro de Trasplante | *Numerador:* 100 x número de pacientes en lista de espera que han sido remitidos al Centro de Trasplante antes de 6 meses de entrada en hemodiálisis periódica  *Denominador:* número total de pacientes excepto aquellos que tienen contraindicaciones para el trasplante o que rechazan ser incluidos en lista de espera | Anual | Por definir |
| --- | --- | --- | --- |
| Porcentaje de pacientes en lista de espera que han sido trasplantados | *Numerador:* 100 x número de pacientes trasplantados  *Denominador:* número de pacientes en lista de espera | Anual | Por definir |

- 1. Anexo 8: Índice de Charlson modificado

| Patología | Puntuación |
| --- | --- |
| Enfermedad coronaria | 1 |
| Insuficiencia cardiaca congestiva | 1 |
| Enfermedad vascular periférica | 1 |
| Enfermedad vascular cerebral | 1 |
| Demencia | 1 |
| Enfermedad pulmonar crónica | 1 |
| Enfermedad del tejido conectivo | 1 |
| Ulcera péptica | 1 |
| Enfermedad hepática leve | 1 |
| Diabetes | 1 |
| Hemiplegia | 2 |
| Enfermedad renal moderada-severa | 2 |
| Diabetes con daño de órganos diana | 2 |
| Cualquier tumor, leucemia, linfoma | 2 |
| Enfermedad hepática moderada-severa | 3 |
| Tumor sólido metastático | 6 |
| SIDA | 6 |
| Además, por cada década de edad > 40 años, se añade 1 punto más. | |

En los pacientes en diálisis no diabéticos tendrán una puntuación mínima de 2 (correspondiente a su enfermedad renal).

Nefropatía diabética de 4 (2 por la diabetes con afectación de órganos diana y 2 por la enfermedad renal).

Insuficiencia renal crónica de otra etiología y diabetes sin daño de órganos diana de 3 (1 por la diabetes y 2 por la enfermedad renal).

En el estudio de Bedhu579 se propone una división de la comorbilidad en cuatro grupos: baja (<4), media (4 y 5), alta (6 y 7) y muy alta (>7), que presentan un número de admisiones y de días de ingreso, unos costes hospitalarios y unas tasas de mortalidad anual significativamente crecientes. Los pacientes con IC > 7 tenían una tasa de mortalidad por paciente y año de 0,47, es decir cerca de la mitad de los pacientes.

*A continuación, se incluye una descripción de cada uno de los ítems, según aparecen en el apéndice del artículo original540, con la modificación propuesta por Bedhu579.*

*Enfermedad coronaria:* pacientes con angina, infarto de miocardio, evidencia angiográfica de enfermedad coronaria, antecedentes de angioplastia y/o antecedentes de cirugía de by-pass.

*Insuficiencia cardiaca congestiva*: Pacientes que han tenido disnea de esfuerzo o disnea paroxística nocturna y que han respondido sintomáticamente (o en la exploración física) a tratamiento con digital, diuréticos o agentes que reducen la postcarga. No incluye aquellos pacientes que están tomando estas medicaciones pero que no han experimentado mejoría en los síntomas y en los que no existe evidencia de mejoría en los signos físicos.

*Enfermedad vascular periférica*: pacientes con claudicación intermitente o que tienen un by-pass por insuficiencia arterial; amputación, gangrena o insuficiencia arterial aguda; aneurismas torácicos o abdominales (de 6 cms o más) que no hayan sido intervenidos.

*Enfermedad vascular cerebral*: pacientes con historia de accidentes cerebrovasculares (con secuelas menores o sin secuelas) y de accidentes isquémicos transitorios.

*Demencia*: pacientes con déficit cognitivo crónico.

*Enfermedad pulmonar crónica*: pacientes que tiene disnea, atribuible a su enfermedad pulmonar, con esfuerzos de intensidad moderada, estén o no con tratamiento, y aquellos con episodios agudos de disnea severa (p.e. asma).

*Enfermedad del tejido conectivo*: pacientes con lupus eritematoso sistémico, polimiositis, enfermedad mixta del tejido conectivo, polimialgia reumática y artritis reumatoide moderada o severa.

*Úlcera péptica*: pacientes que requieren o han requerido tratamiento por enfermedad ulcerosa gástrica o duodenal.

*Enfermedad hepática leve*: pacientes con hepatitis crónica o cirrosis sin hipertensión portal.

*Diabetes*: pacientes diabéticos, tratados con antidiabéticos orales o insulina, que no presentan retinopatía, neuropatía ni nefropatía.

*Hemiplejia*: pacientes con hemiplejia o paraplejia establecidas, ocurridas como consecuencia de accidente vascular cerebral o cualquier otro proceso.

*Enfermedad renal moderada-severa*: pacientes con creatinina en plasma > 3 mg/dl (moderada) y pacientes en insuficiencia renal crónica terminal, en diálisis o trasplantados (severa).

*Diabetes con daño de órganos diana*: pacientes diabéticos que presentan retinopatía, neuropatía y/o nefropatía.

*Tumores, leucemia, linfoma*: pacientes con cualquier tipo de tumor hematológico (mieloma, leucemia, linfoma, Hodgkin, macroglobulinemis, etc.) o con un tumor sólido sin evidencia de metástasis.

*Enfermedad hepática moderada-severa*: pacientes con cirrosis e hipertensión portal.

*Tumor sólido metastásico*: pacientes con tumores de cualquier localización en los que existe evidencia de metástasis.

*SIDA*: pacientes diagnosticados de SIDA.

- 1. Anexo 9: Selecting a target Kt by BSA based on Eq. (1).


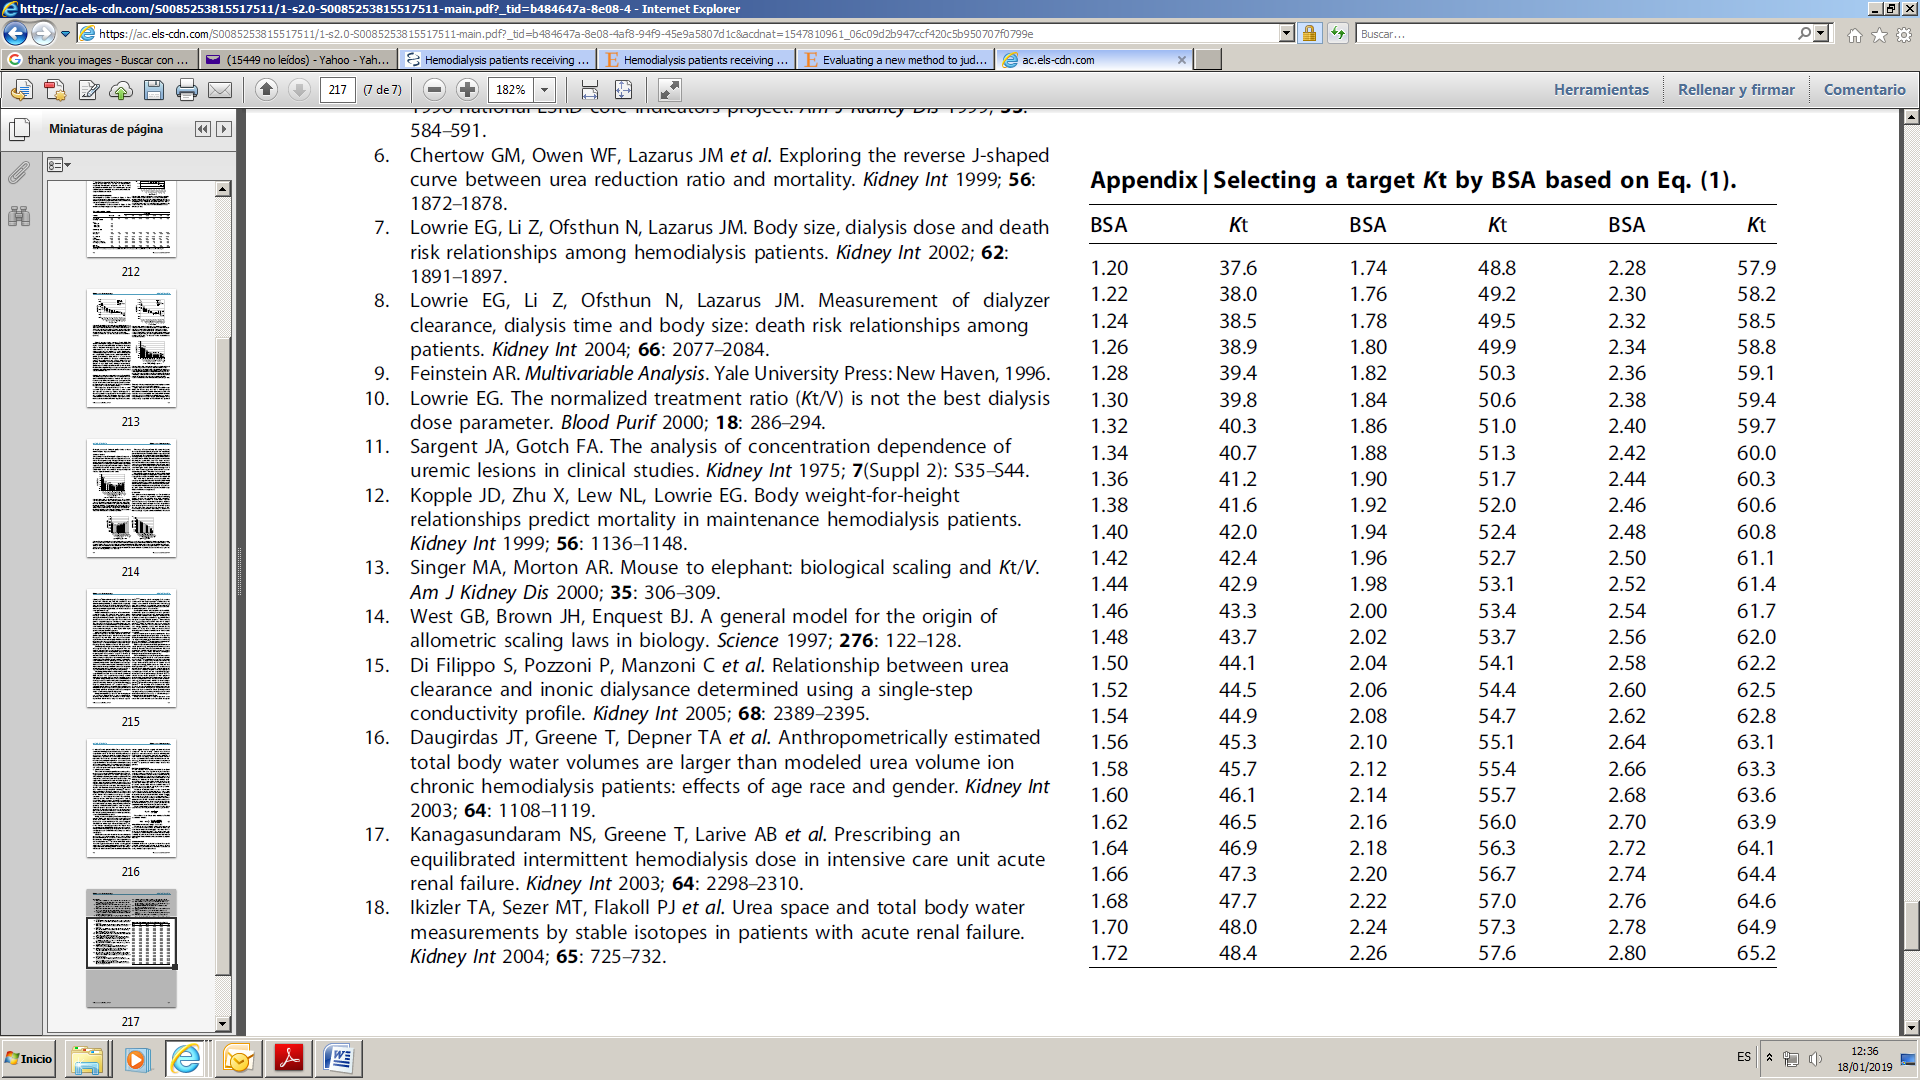


- 1. Anexo 10: Relación de eventos adversos

| EVENTOS ADVERSOS | Fallo/causa | Medidas preventivas |
| --- | --- | --- |
| Hipotensión  Calambres  Dolor precordial  Arritmias  Náuseas/vómitos | Error al pesar al paciente. No pesar.  No vigilancia directa del peso del paciente  Error en la báscula/Anotación equivocada en la gráfica de diálisis | Pesar siempre al paciente el personal sanitario/volver a pesar en caso de duda/anotar el peso en el momento de pesarlo/intentar pesar siempre al paciente antes y después/mantenimiento de las básculas/verificar el cálculo del peso |
| Ultrafiltración excesiva | No programar UF horaria superior a 10-13 ml/kg/hora  Reflejar siempre la UF máxima de la hoja de prescripción de HD |
| Peso seco inadecuado | Verificar síntomas de sobrecarga / depleción de volumen en cada sesión de diálisis y detectar signos que sugieran modificación del peso seco |
| Error en el cálculo del peso | Comprobar siempre antes de la programación del monitor y horariamente |
| Intolerancia a la alimentación durante la diálisis | No dar alimentos en diálisis a aquellos que no los toleren |
| Toma de hipotensores antes de la diálisis | No prescribir medicamentos antihipertensivos antes de la diálisis |
| Dializar con temperatura alta en el LD | Ajustar la temperatura del LD a 35,5 ºC y 36,5 ºC |
| Dializar con conductividad baja | Ajustar el sodio del LD  No dializar con conductividad inferior a 13,7 mS/cm |
| Desconexión transitoria durante la HD | Retornar todo el volumen antes de la desconexión  Volver a pesar y recalcular la UF |
| Hipertensión arterial | Peso seco inadecuado | Verificar síntomas de sobrecarga / depleción de volumen en cada sesión de diálisis y detectar signos que sugieran modificación del peso seco/ utilización de bioimpedancia |
| Tratamiento antihipertensivo inadecuado | Ajustar medicación hipotensora/evitar la toma de hipotensores antes de la diálisis |
| Infección relacionada con el acceso vascular | No adecuada higiene de manos/ No cumplimiento de asepsia en conexión y desconexión/ Errores en la manipulación del acceso vascular (FAV y catéteres) | Formación del personal/lavar el brazo o el área de punción, con agua y jabón/desinfección de la zona/Utilizar el método escalonado de punción/en manipulación de catéteres: uso de mascarilla tanto por parte del paciente como del profesional, lavado higiénico de manos y utilización de guantes y campo estéril. La manipulación de los extremos de las líneas de diálisis que se van a conectar al catéter se realizará con la máxima precaución posible para evitar su contaminación |
| Extravasación venosa o hematomas | Defecto de técnica del personal/ inadecuada atención/ prisas/formación insuficiente | Formación del personal /tener en cuenta calibre, longitud de aguja, velocidad máxima de la bomba de sangre y duración de la sesión de HD/usar aguja arterial con fenestración/ Utilizar aguja de menor calibre disponible en primeras punciones/ En las punciones dificultosas o en las primeras punciones, comprobación de la canalización utilizando suero fisiológico/ Utilizar el método escalonado de punción/ deben utilizarse siempre 2 dedos para efectuar la hemostasia después de retirar la aguja, uno destinado a comprimir el orificio externo y el otro a comprimir el agujero interno |
| Complicaciones agudas de FAV (trombosis) | Fallo en la monitorización del acceso vascular/Defecto de técnica del personal/ Inadecuada vigilancia del paciente/ | Formación del personal /  Establecer programas y sistemas de monitorización del acceso vascular de última generación (ecografía, transonic)/técnicas de punción que aumenten la supervivencia de la FAV: punción “arterial” en sentido anterógrado/orientación del bisel hacia arriba/ no rotación de la aguja (180 grados) en la canulación/Utilizar el método escalonado de punción |
| Disfunción/rotura de catéter | Defecto de técnica del personal/ inadecuada atención/ prisas/formación insuficiente/ inadecuada anticoagulación/ inadecuada formación de cuidados al paciente | Formación del personal /formación del paciente/sellado adecuado con heparina |
| Salida de agujas | Deficiente fijación de las agujas a la piel, esparadrapo con adherencia defectuosa, tracción de alguna de las líneas del circuito o el movimiento súbito de la extremidad de la FAV. | Fijar adecuadamente las agujas y las líneas sanguíneas con un margen de espacio suficiente para evitar tracciones peligrosas. Mantener siempre la extremidad a la vista y, si es necesario, inmovilizada. Ante la salida de una de las agujas comprimir el punto de punción sangrante, detener la bomba de sangre si esto no se ha producido automáticamente y pinzar la línea correspondiente, estimar el volumen de sangre perdido y comprobar la estabilidad hemodinámica del paciente |
| Sangrado excesivo postHD | Fallo en la punción del AV (Punciones repetidas en la misma zona)  Mala compresión/ prisas | Formación del personal /Utilizar el método escalonado de punción/Cada aguja debe retirarse aproximadamente en el mismo ángulo en que fue insertada/deben utilizarse siempre 2 dedos para efectuar la hemostasia después de retirar la aguja, uno destinado a comprimir el orificio externo y el otro a comprimir el agujero interno/retirar primero la aguja “venosa”, efectuar la hemostasia correspondiente a este nivel y, a continuación, retirar la aguja “arterial”/La compresión manual tiene que mantenerse como mínimo 10 minutos/formación del paciente en autocuidados |
| Coagulación del sistema | No seguimiento de órdenes médicas/heparina insuficiente/  vigilancia inadecuada de la sesión | Adecuada anticoagulación durante la hemodiálisis /Vigilancia apropiada de las alarmas venosas durante la sesión, actuando de forma precoz antes de la coagulación completa del circuito |
| Reacciones alérgicas | Fallo en la comprobación de alergias | Registrar alergias de modo visible, comprobar dichas alergias |
| Seroconversión a VHC/VHB o HIV | No cumplimiento de las precauciones universales/No adecuada desinfección de monitores/no limpieza externa | Cumplimiento estricto de precauciones universales/no utilizar viales multidosis |
| Caídas | Tutela insuficiente del paciente dependiente/ Mala valoración del grado de dependencia/ratio inadecuada de personal para ese tipo de paciente | Adecuada identificación del nivel de dependencia de los pacientes y tutelaje por el personal sanitario mientras se encuentren en la unidad/ barreras en las camas/seguimiento de la hipotensión ortostática postHD/evaluación de la marcha y la visión. |
| Muerte durante o después de HD | Error técnico y/o humano | Optimizar la dosis de diálisis, vigilar niveles de potasio, el tiempo de tratamiento no inferior a 4 horas, UF inferior a 5,7 % del peso postdiálisis |
| Hemólisis | Error técnico y/o humano /Solución de diálisis /Fallo de mantenimiento de monitores | Mantenimiento adecuado de monitores/Mantenimiento adecuado de la planta de aguas/ monitorización del líquido de diálisis |
| Intoxicación alumínica | Error técnico y/o humano/Fallo en los controles de la planta de agua / Fallo de mantenimiento y vigilancia planta aguas/fallo supervisión médica. | Mantenimiento adecuado de la planta de aguas /monitorización de niveles de aluminio en agua de diálisis. |
| Embolia gaseosa | Error técnico y/o humano  No utilizar los detectores de aire del monitor/ recuperar sin suero salino/desconexión inadecuada de catéteres centrales. | Utilizar siempre los detectores de aire del monitor/ recuperar con suero. |
| Síndrome de desequilibrio | Programación inadecuada de la sesión de diálisis. No prescripción de diálisis lenta, con bajo flujo y cortos tiempos con frecuentes intervalos en las primeras diálisis. | Prescripción de tres diálisis en días consecutivos con aumento progresivo del tiempo y del flujo de sangre con dializadores de poca superficie. |
| Reacción a pirógenos | Error técnico y/o humano/ Fallo en los controles de la planta de agua. | Mantenimiento adecuado de la planta de aguas. |
